# Supplementary material for: Identification of Natural Compounds as Inhibitors of Pyruvate Kinase M2 for Cancer Treatment
Source: MDPI journal article supplement (doi:10.3390/molecules27207113), 2022-10-21
Supplement: s1 [file s1]

**Table S1.** Natural compounds library used for the screening of PKM2 inhibitors

| Sr. No. | Compound Name        | Sr. No. | Compound Name |
|---------|----------------------|---------|---------------|
| 1       | Cinnamic acid        | 20      | Sinensetin    |
| 2       | p-Coumaric acid      | 21      | Scopoletin    |
| 3       | Gallic acid          | 22      | Curcumol      |
| 4       | Ferulic acid         | 23      | Arbutin       |
| 5       | Quercetin            | 24      | Vitexin       |
| 6       | Syringic acid        | 25      | Phloretin     |
| 7       | Limonene             | 26      | Rutin         |
| 8       | Polydatin            | 27      | Hesperidin    |
| 9       | Ellagic acid         | 28      | Berberine     |
| 10      | Resveratrol          | 29      | Diosmetin     |
| 11      | Demethoxycurcumin    | 30      | Apigenin      |
| 12      | Bisdemethoxycurcumin | 31      | Physcion      |
| 13      | Curcumin             | 32      | Hispolon      |
| 14      | Chlorogenic acid     | 33      | Scutellarein  |
| 15      | Silibinin            | 34      | Vanillin      |
| 16      | Mangiferin           | 35      | Tangeretin    |
| 17      | Juglone              | 36      | Nobiletin     |
| 18      | Rosmaniric acid      | 37      | Formononetin  |
| 19      | Cardamonin           | 38      | Tubeimoside-I |
